# Supplementary material for: Trait Differentiation within the Fungus-Feeding (Mycophagous) Bacterial Genus Collimonas
Source: PLoS One. 2016 Jun 16;11(6):e0157552. doi: 10.1371/journal.pone.0157552 (PMC4911057; doi:10.1371/journal.pone.0157552)
Supplement: S1 Table — "Strain" indicates the name of the Collimonas isolate. Collimomycin genes (cluster K, see Fritsche et al 2014) were either not determined (NA), not present (1) or present (2). Mineral weathering (free Fe released) was either quantified in mgL-1, see Uroz et al 2009) or not determined (NA). Siderophores were quantified by a CAS-overlay assay (mm diameter of colony sourrounding halo), NA indicates not determined. Chitinase activity was quantified by halo formation on Chitin agar, no degradation (0) and degradation (1) are indicated. In fungal inhibition assays (R. solani, M. hiemalis, P. ultimum, F. oxysporum, F. culmorum, A.niger, P. exigua and T. harzianum, “1” indicates inhibition of the respective fungus and “0” indicates no inhibition of the respective fungus. Purple = “1” indicates a purple pigmentation of the respective strain, purple = “0” no purple pigmentation. VioA/B = “0” means that the respective genes, VioA and VioB, could not be amplified (Hakvåg, et al. 2009), VioA/B = “1” means that fragments could be amplified but they do not have the right size, VioA/B = 2 means that right size fragments were amplified. Mycophagy ratios were determined for possible growth on M. hiemalis and T. harzianum (NA indicates no meassurement and “0” indicates that the data has been deleted from the dataset because of too much variation between replicates. Soil pH indicates the pH of the soil from which the respective strain was isolated (NA = not determined). Country stands for the country of isolation (“1” = The Netherlands, “2” = France, “3” = Finnland). Species is either not determined (NA), C. fungivorans (1), C. arenae (2) or C. pratensis (3). Habitat indicates the habitat from which the strain was isolated, either being “NA” = no data available, “emf_soil” = hypha of ectomycorrhizal fungus, “arctic_bulk” = arctic bulk soil, “arctic_forest” = arctic forest soil, “arctic_tundra” = arctic tundra soil, “endophyte” = the inside of a plant root, “former_agr_field” = abandonn [file pone.0157552.s001.xlsx]

## Sheet: Sheet1
Supplementary Table S1: Overview on trait data, habitat data, species affiliation and reference. "Strain" indicates the name of the Collimonas isolate. Collimomycin genes (cluster K, see Fritsche et al 2014) were either not determined (0), not present (1) or present (2). Mineral weathering (free Fe released) was either quantified in mgL-1, see Uroz et al 2009) or not determined (NA). Siderophores…
					Fungal inhibition								Violacein production			Mycophagy						swarming
Strain	Collimomycin	Weathering	Siderophores	Chitinase	R. solani	M. hiemalis	P. ultimum	F. oxysporum	F. culmorum	A. niger	P. exigua	T. harzianum	Purple	VioB	VioA	M. hiemalis	R. solani	Soil ph	Country	Species	Habitat	Intensity	Shape	Reference
AD064	0	NA	0.5	1	0	0	0	0	0	0	0	0	0	1	0	NA	NA	5.7	1	0	no_data	2	finger_edge_hands	De-Ridder Duine et al., 2005
AD065	0	NA	68.1	1	1	0	1	0	1	1	1	0	0	0	0	75.41	15.17	5.5	1	0	no_data	0	no_swarming	De-Ridder Duine et al., 2005
AD076	0	NA	0	1	0	0	0	0	0	0	0	0	0	0	1	0	0	5.1	1	0	no_data	0	no_swarming	De-Ridder Duine et al., 2005
AD078	0	NA	37.7	1	0	0	1	0	1	0	1	0	0	0	0	NA	NA	4.3	1	0	no_data	0	no_swarming	De-Ridder Duine et al., 2005
AD103	0	NA	66	1	1	0	1	0	1	1	1	0	0	0	0	NA	NA	4	1	0	no_data	0	no_swarming	De-Ridder Duine et al., 2005
CPMB23	0	0.8	64	1	1	0	1	0	1	1	1	0	0	0	0	NA	NA	4	2	0	emf_soil	1	runner	Uroz et al., 2007
CPMB31	0	NA	67.3	1	1	0	1	0	1	1	1	0	0	0	0	NA	NA	4	2	0	emf_soil	0	no_swarming	Uroz et al., 2007
CPML32	0	1.3	43.9	1	1	0	1	0	1	1	1	0	0	0	0	62.48	0	4	2	0	emf_soil	1	finger_edge_hands	Uroz et al., 2007
CPML34	0	1	34.8	1	0	0	0	0	0	0	0	0	0	1	0	79.62	8.92	4	2	0	emf_soil	1	diffuse	Uroz et al., 2007
CPML37	0	1.6	NA	0	1	0	0	0	0	0	1	0	0	0	0	NA	NA	4	2	0	emf_soil	3	full_plate	Uroz et al., 2007
CPML38	0	1.5	61.4	1	1	0	1	0	1	1	1	0	0	0	0	NA	NA	4	2	0	emf_soil	1	meteor	Uroz et al., 2007
EPMY118	0	1.7	3.1	1	1	0	1	0	1	1	1	0	0	0	0	NA	NA	4	2	0	emf_soil	1	finger_edge	Uroz et al., 2007
EPMY119	0	1.4	NA	1	1	0	1	0	1	1	1	0	0	0	0	NA	NA	4	2	0	emf_soil	1	shell	Uroz et al., 2007
J23	0	NA	80	1	1	0	1	0	1	1	1	0	0	0	1	62.33	1.94	6.2	3	0	arctic_bulk	0	no_swarming	Nissinen et al., 2012
J40_1	0	NA	13	1	1	0	1	1	1	1	1	0	1	2	2	99.38	0.68	6.2	3	0	arctic_bulk	1	ring	Nissinen et al., 2012
J41_1	0	NA	0	1	1	0	1	0	1	1	1	0	1	2	2	83.69	0.68	6.2	3	0	arctic_bulk	1	finger_edge	Nissinen et al., 2012
J55	0	NA	14.6	1	1	0	1	0	1	1	1	0	0	0	0	93.43	0	6.2	3	0	arctic_bulk	1	finger_edge	Nissinen et al., 2012
J8_1	0	NA	60.2	1	1	0	1	0	1	1	1	0	0	0	1	NA	NA	6.2	3	0	arctic_bulk	0	no_swarming	Nissinen et al., 2012
K2X3	0	1.2	0.6	1	1	0	1	0	1	1	1	0	0	1	0	67.27	0	4.9	3	0	arctic_forest	1	diffuse_finger_edge	Männistö and Häggblom, 2006
M1J3	0	0.8	13.9	1	0	0	0	0	0	0	0	0	0	1	0	94.44	0	5.3	3	0	arctic_tundra	1	splash	Männistö and Häggblom, 2006
M1R1	0	1.3	0	0	0	0	0	0	0	0	0	0	0	0	0	NA	NA	5.3	3	0	arctic_tundra	1	shell	Männistö and Häggblom, 2006
M1T1	0	0.9	55.4	1	1	0	1	0	1	1	1	0	0	0	0	89.65	1.56	5.3	3	0	arctic_tundra	0	no_swarming	Männistö and Häggblom, 2006
M1T7	0	0.7	52.9	1	1	0	1	0	1	1	1	0	0	0	0	NA	NA	5.3	3	0	arctic_tundra	0	no_swarming	Männistö and Häggblom, 2006
M1V1	0	NA	0	1	1	0	1	0	1	1	1	0	1	2	2	NA	NA	5.3	3	0	endophyte	1	finger_edge	Nissinen et al., 2012
M1V16	0	NA	0	1	0	0	1	0	1	1	1	0	1	2	2	NA	NA	5.3	3	0	endophyte	1	finger_edge	Nissinen et al., 2012
M1V8	0	NA	71.8	1	1	0	1	0	1	1	1	0	0	0	0	54.05	9.25	5.3	3	0	endophyte	0	no_swarming	Nissinen et al., 2012
M1V9	0	NA	77.1	1	1	0	1	0	1	1	1	0	0	0	0	121.91	14.62	5.3	3	0	endophyte	0	no_swarming	Nissinen et al., 2012
Myc17	0	NA	17.6	1	0	0	0	0	0	0	0	0	0	1	0	NA	NA	5.6	1	0	former_agr_field	2	star	this study
Myc44	0	NA	51.2	1	0	0	0	0	0	0	0	0	0	1	0	NA	NA	5.6	1	0	former_agr_field	1	star	this study
Myc46	0	NA	23.1	1	0	0	0	0	0	0	0	0	0	1	0	NA	NA	5.6	1	0	former_agr_field	2	star	this study
Myc49	0	NA	1.7	1	0	0	0	0	0	0	0	0	0	1	0	NA	NA	5.6	1	0	former_agr_field	2	star	this study
Myc51	0	NA	0.7	1	0	0	0	0	0	0	0	0	0	1	0	NA	NA	5.6	1	0	former_agr_field	1	star	this study
Myc52	0	NA	13.8	1	0	0	0	0	0	0	0	0	0	1	0	NA	NA	5.6	1	0	former_agr_field	2	star	this study
P2	0	NA	2.5	1	1	0	1	0	1	1	1	0	1	2	2	NA	NA	NA	1	0	beech_forest	0	no_swarming	this study
P3	0	NA	2.9	1	1	0	1	0	1	1	1	0	1	2	2	70.18	3	NA	1	0	beech_forest	0	no_swarming	this study
R5TW1	0	NA	73.6	1	1	0	1	0	1	0	1	0	0	0	0	NA	NA	5	3	0	arctic_forest	0	no_swarming	Männistö and Häggblom, 2006
RA1BR1	0	1.1	1	1	1	0	1	1	1	1	1	0	1	2	2	NA	NA	5	3	0	arctic_forest	1	finger_edge_hands2	Männistö and Häggblom, 2006
RAJ3R3	0	1.2	0	1	1	0	1	0	1	1	1	0	1	2	2	NA	NA	5	3	0	arctic_forest	1	finger_edge_hands2	Männistö and Häggblom, 2006
S18_2	0	NA	0	0	0	0	0	0	0	0	0	0	0	0	0	NA	NA	6.1	3	0	arctic_bulk	0	no_swarming	Nissinen et al., 2012
S1E1	0	1.3	60.1	1	1	0	1	0	1	1	1	0	0	0	0	NA	NA	5.3	3	0	arctic_tundra	0	no_swarming	Männistö and Häggblom, 2006
S21	0	NA	60.1	1	1	0	1	0	1	0	1	0	1	2	2	NA	NA	6.1	3	0	arctic_bulk	0	no_swarming	Nissinen et al., 2012
S33	0	NA	0	0	0	0	0	0	0	0	0	0	0	0	0	64.37	0	6.1	3	0	arctic_bulk	0	no_swarming	Nissinen et al., 2012
S56_2	0	NA	47.3	1	1	0	1	0	1	1	1	0	1	2	2	NA	NA	6.1	3	0	arctic_bulk	0	no_swarming	Nissinen et al., 2012
S5T5	0	0.6	80.4	1	1	0	1	0	1	1	1	0	1	2	2	182.64	0	5.3	3	0	arctic_tundra	0	no_swarming	Männistö and Häggblom, 2006
SO06	2	NA	0	1	0	0	0	0	0	0	0	0	0	1	0	79.48	5.83	5.3	1	0	unfert_grassland	1	finger_edge	Höppener-Ogawa et al., 2007
SO08	2	NA	0	1	0	0	0	0	0	0	0	0	0	1	0	NA	NA	5.3	1	0	unfert_grassland	1	diffuse_finger_edge	Höppener-Ogawa et al., 2007
SO09	2	NA	0	1	0	0	0	0	0	0	0	0	0	1	0	NA	NA	5.3	1	0	unfert_grassland	1	finger_edge	Höppener-Ogawa et al., 2007
SO108	1	NA	7.7	1	1	0	1	0	1	0	1	0	0	0	0	NA	NA	5.3	1	2	coastal_outer_dunes	0	no_swarming	Höppener-Ogawa et al., 2007
SO109	0	NA	3.9	1	1	0	1	0	1	1	1	0	1	2	2	61.9	1.27	5.3	1	0	coastal_outer_dunes	1	finger_edge	Höppener-Ogawa et al., 2007
SO110	1	NA	68.3	1	1	0	1	0	1	1	1	0	0	0	0	77.74	19.86	5.3	1	2	coastal_outer_dunes	0	no_swarming	Höppener-Ogawa et al., 2007
SO111	1	NA	7.2	1	1	0	1	0	1	0	1	0	0	0	0	NA	NA	5.3	1	2	coastal_outer_dunes	0	no_swarming	Höppener-Ogawa et al., 2007
SO112	0	NA	19.7	1	1	0	1	0	1	1	1	0	1	2	2	NA	NA	5.3	1	0	coastal_outer_dunes	1	ring	Höppener-Ogawa et al., 2007
SO113	1	NA	44.6	1	1	0	1	0	1	1	1	0	0	0	0	82.38	0	5.3	1	2	coastal_outer_dunes	1	ring2	Höppener-Ogawa et al., 2007
SO114	2	NA	56.3	1	0	0	0	0	0	0	0	0	0	1	0	NA	NA	5.1	1	0	former_agr_field	0	no_swarming	Höppener-Ogawa et al., 2007
SO115	1	NA	14.8	1	0	0	0	0	0	0	0	0	0	1	0	NA	NA	5.1	1	0	former_agr_field	1	finger_edge	Höppener-Ogawa et al., 2007
SO117	1	NA	0.8	1	1	0	1	0	1	1	1	0	0	0	0	NA	NA	5.1	1	2	former_agr_field	0	no_swarming	Höppener-Ogawa et al., 2007
SO122	0	NA	NA	1	0	0	0	0	0	0	0	0	0	1	2	0	1.99	5.8	1	0	unfert_grassland	3	full_plate	Höppener-Ogawa et al., 2007
SO132	0	NA	89.5	1	0	0	0	0	0	0	0	0	0	1	0	9.88	0	4.7	1	3	marsh	0	no_swarming	Höppener-Ogawa et al., 2007
SO147	2	NA	1.2	1	0	0	0	0	0	0	0	0	0	1	0	41.85	6.55	5.6	1	0	former_agr_field	1	ring	Höppener-Ogawa et al., 2007
SO195	1	NA	27.6	1	1	0	1	0	1	1	1	0	1	2	2	NA	NA	5.1	1	2	unfert_grassland	1	finger_edge	Höppener-Ogawa et al., 2007
SO198	0	NA	58.4	1	0	0	0	0	0	0	0	0	0	0	0	77.01	3.76	5.1	1	2	unfert_grassland	0	no_swarming	Höppener-Ogawa et al., 2007
SO30	1	NA	0.3	1	0	0	0	0	0	0	0	0	0	1	0	NA	NA	4.9	1	0	river_dune_grassland	1	finger_edge	Höppener-Ogawa et al., 2007
SO31	1	NA	75.2	1	1	0	1	0	1	1	1	0	0	0	0	94.01	32.28	5.3	1	2	coastal_outer_dunes	0	no_swarming	Höppener-Ogawa et al., 2007
SO32	1	NA	64.8	1	1	0	1	0	1	1	1	0	0	0	0	NA	NA	5.3	1	2	coastal_outer_dunes	1	star	Höppener-Ogawa et al., 2007
SO85	1	1.3	80.6	1	1	0	1	0	1	1	1	0	0	0	0	50.13	30.25	4.1	1	2	river_dune_grassland	0	no_swarming	Höppener-Ogawa et al., 2007
SO92	0	1.6	35.8	1	1	0	1	0	1	1	1	0	0	1	0	73.67	0	4.9	1	0	heathland	1	meteor	Höppener-Ogawa et al., 2007
SO95	0	1.4	0	0	0	0	0	0	0	0	0	0	0	1	0	NA	NA	4.9	1	0	heathland	0	no_swarming	Höppener-Ogawa et al., 2007
SO96	0	1.5	0	1	1	0	1	0	1	1	1	0	0	0	0	NA	NA	4.9	1	0	heathland	1	coliflower	Höppener-Ogawa et al., 2007
Ter10	1	1.7	13	1	0	0	0	0	0	0	0	0	0	1	0	26.44	1.39	6.1	1	3	dune_grassland	2	star	De Boer et al., 2004
Ter113	0	NA	58.9	1	1	0	1	1	1	1	1	0	0	0	0	NA	NA	6.1	1	2	dune_grassland	0	no_swarming	De Boer et al., 2004
Ter118	1	0.9	63.4	1	1	0	1	0	1	1	1	0	0	0	0	47.66	0	6.1	1	2	dune_grassland	0	no_swarming	De Boer et al., 2004
Ter14	2	1.2	0	1	0	0	0	0	0	0	0	0	0	1	0	NA	NA	4.9	1	0	coastal_outer_dunes	2	finger_edge	De Boer et al., 2004
Ter146	1	1.8	0.7	1	0	0	0	0	0	0	0	0	0	1	0	NA	NA	6.1	1	3	dune_grassland	2	star	De Boer et al., 2004
Ter165	2	1.2	24.7	1	0	0	0	0	0	0	0	0	0	1	0	NA	NA	4.9	1	0	coastal_outer_dunes	0	no_swarming	De Boer et al., 2004
Ter166	1	1.3	19.1	1	0	0	0	0	0	0	0	0	0	1	0	NA	NA	4.9	1	1	dune_grassland	1	coliflower	De Boer et al., 2004
Ter227	1	NA	7.3	1	0	0	0	0	0	0	0	0	0	0	0	52.89	5.66	4.9	1	2	dune_grassland	1	finger_edge	De Boer et al., 2004
Ter228	2	1.1	0.9	1	0	0	0	0	0	0	0	0	0	1	0	33.56	4.99	4.9	1	0	dune_grassland	1	inside_finger	De Boer et al., 2004
Ter252	1	1	88.8	1	0	0	0	0	0	0	0	0	0	1	0	NA	NA	6.1	1	3	dune_grassland	0	no_swarming	De Boer et al., 2004
Ter266	2	NA	0	1	0	0	0	0	0	0	0	0	0	1	0	NA	NA	4.9	1	0	dune_grassland	2	finger_edge	De Boer et al., 2004
Ter282	1	1.5	66.9	1	0	0	0	0	0	0	0	0	0	1	0	NA	NA	6.1	1	3	dune_grassland	2	star	De Boer et al., 2004
Ter291	1	NA	44.6	1	1	0	1	1	1	1	1	0	0	0	0	NA	NA	6.1	1	2	dune_grassland	1	runner	De Boer et al., 2004
Ter299	2	NA	0	1	0	0	0	0	0	0	0	0	0	1	0	71.78	4.31	4.9	1	0	coastal_outer_dunes	1	finger_edge	De Boer et al., 2004
Ter300	1	1.1	0.5	1	0	0	0	0	0	0	0	0	0	1	0	NA	NA	4.9	1	1	dune_grassland	1	finger_edge	De Boer et al., 2004
Ter330	1	1.5	0.4	1	0	0	0	0	0	0	0	0	0	1	0	NA	NA	4.9	1	1	dune_grassland	1	finger_edge	De Boer et al., 2004
Ter331	2	1.8	0.4	1	0	0	0	0	0	0	0	0	0	1	0	21.5	0	4.9	1	0	coastal_outer_dunes	1	finger_edge	De Boer et al., 2004
Ter6	1	1.7	0	1	0	0	0	0	0	0	0	0	0	1	0	0	0	4.9	1	1	dune_grassland	1	meteor	De Boer et al., 2004
Ter72	0	NA	6.2	1	1	0	1	1	1	1	1	0	0	0	0	NA	NA	6.1	1	0	coastal_outer_dunes	0	no_swarming	De Boer et al., 2004
Ter90	1	1.4	62	1	1	0	1	0	1	1	1	0	0	1	0	34.44	25.23	4.9	1	2	dune_grassland	0	no_swarming	De Boer et al., 2004
Ter91	1	1.4	8.2	1	0	0	0	0	0	0	0	0	0	0	0	92.26	5.49	4.9	1	2	dune_grassland	0	no_swarming	De Boer et al., 2004
Ter94	0	NA	59.8	1	0	0	0	0	0	0	0	0	0	0	0	NA	NA	4.9	1	0	coastal_outer_dunes	1	finger_edge	De Boer et al., 2004

## Sheet: Sheet2
					Fungal inhibition								Violacein production			Mycophagy						swarming
Strain	Comy	Weathering	Sid	Chi	RS	MH	PU	FO	FC	AN	PE	TH	Purple	VioB	VioA	M. hiemalis	R. solani	Soil ph	Country	Species	Habitat	Intensity	Shape	Reference
AD064	NA	NA	0.5	1	0	0	0	0	0	0	0	0	0	1	0	NA	NA	5.7	1	NA	NA	2	finger_edge_hands	De-Ridder Duine et al., 2005
AD065	NA	NA	68.1	1	1	0	1	0	1	1	1	0	0	0	0	75.41	15.17	5.5	1	NA	NA	0	no_swarming	De-Ridder Duine et al., 2005
AD076	NA	NA	0	1	0	0	0	0	0	0	0	0	0	0	1	0	0	5.1	1	NA	NA	0	no_swarming	De-Ridder Duine et al., 2005
AD078	NA	NA	37.7	1	0	0	1	0	1	0	1	0	0	0	0	NA	NA	4.3	1	NA	NA	0	no_swarming	De-Ridder Duine et al., 2005
AD103	NA	NA	66	1	1	0	1	0	1	1	1	0	0	0	0	NA	NA	4	1	NA	NA	0	no_swarming	De-Ridder Duine et al., 2005
CPMB23	NA	0.8	64	1	1	0	1	0	1	1	1	0	0	0	0	NA	NA	4	2	NA	emf_soil	1	runner	Uroz et al., 2007
CPMB31	NA	NA	67.3	1	1	0	1	0	1	1	1	0	0	0	0	NA	NA	4	2	NA	emf_soil	0	no_swarming	Uroz et al., 2007
CPML32	NA	1.3	43.9	1	1	0	1	0	1	1	1	0	0	0	0	62.48	0	4	2	NA	emf_soil	1	finger_edge_hands	Uroz et al., 2007
CPML34	NA	1	34.8	1	0	0	0	0	0	0	0	0	0	1	0	79.62	8.92	4	2	NA	emf_soil	1	diffuse	Uroz et al., 2007
CPML37	NA	1.6	NA	0	1	0	0	0	0	0	1	0	0	0	0	NA	NA	4	2	NA	emf_soil	3	full_plate	Uroz et al., 2007
CPML38	NA	1.5	61.4	1	1	0	1	0	1	1	1	0	0	0	0	NA	NA	4	2	NA	emf_soil	1	meteor	Uroz et al., 2007
EPMY118	NA	1.7	3.1	1	1	0	1	0	1	1	1	0	0	0	0	NA	NA	4	2	NA	emf_soil	1	finger_edge	Uroz et al., 2007
EPMY119	NA	1.4	NA	1	1	0	1	0	1	1	1	0	0	0	0	NA	NA	4	2	NA	emf_soil	1	shell	Uroz et al., 2007
J23	NA	NA	80	1	1	0	1	0	1	1	1	0	0	0	1	62.33	1.94	6.2	3	NA	arctic_bulk	0	no_swarming	Nissinen et al., 2012
J40_1	NA	NA	13	1	1	0	1	1	1	1	1	0	1	2	2	99.38	0.68	6.2	3	NA	arctic_bulk	1	ring	Nissinen et al., 2012
J41_1	NA	NA	0	1	1	0	1	0	1	1	1	0	1	2	2	83.69	0.68	6.2	3	NA	arctic_bulk	1	finger_edge	Nissinen et al., 2012
J55	NA	NA	14.6	1	1	0	1	0	1	1	1	0	0	0	0	93.43	0	6.2	3	NA	arctic_bulk	1	finger_edge	Nissinen et al., 2012
J8_1	NA	NA	60.2	1	1	0	1	0	1	1	1	0	0	0	1	NA	NA	6.2	3	NA	arctic_bulk	0	no_swarming	Nissinen et al., 2012
K2X3	NA	1.2	0.6	1	1	0	1	0	1	1	1	0	0	1	0	67.27	0	4.9	3	NA	arctic_forest	1	diffuse_finger_edge	Männistö and Häggblom, 2006
M1J3	NA	0.8	13.9	1	0	0	0	0	0	0	0	0	0	1	0	94.44	0	5.3	3	NA	arctic_tundra	1	splash	Männistö and Häggblom, 2006
M1R1	NA	1.3	0	0	0	0	0	0	0	0	0	0	0	0	0	NA	NA	5.3	3	NA	arctic_tundra	1	shell	Männistö and Häggblom, 2006
M1T1	NA	0.9	55.4	1	1	0	1	0	1	1	1	0	0	0	0	89.65	1.56	5.3	3	NA	arctic_tundra	0	no_swarming	Männistö and Häggblom, 2006
M1T7	NA	0.7	52.9	1	1	0	1	0	1	1	1	0	0	0	0	NA	NA	5.3	3	NA	arctic_tundra	0	no_swarming	Männistö and Häggblom, 2006
M1V1	NA	NA	0	1	1	0	1	0	1	1	1	0	1	2	2	NA	NA	5.3	3	NA	endophyte	1	finger_edge	Nissinen et al., 2012
M1V16	NA	NA	0	1	0	0	1	0	1	1	1	0	1	2	2	NA	NA	5.3	3	NA	endophyte	1	finger_edge	Nissinen et al., 2012
M1V8	NA	NA	71.8	1	1	0	1	0	1	1	1	0	0	0	0	54.05	9.25	5.3	3	NA	endophyte	0	no_swarming	Nissinen et al., 2012
M1V9	NA	NA	77.1	1	1	0	1	0	1	1	1	0	0	0	0	121.91	14.62	5.3	3	NA	endophyte	0	no_swarming	Nissinen et al., 2012
Myc17	NA	NA	17.6	1	0	0	0	0	0	0	0	0	0	1	0	NA	NA	5.6	1	NA	former_agr_field	2	star	this study
Myc44	NA	NA	51.2	1	0	0	0	0	0	0	0	0	0	1	0	NA	NA	5.6	1	NA	former_agr_field	1	star	this study
Myc46	NA	NA	23.1	1	0	0	0	0	0	0	0	0	0	1	0	NA	NA	5.6	1	NA	former_agr_field	2	star	this study
Myc49	NA	NA	1.7	1	0	0	0	0	0	0	0	0	0	1	0	NA	NA	5.6	1	NA	former_agr_field	2	star	this study
					Fungal inhibition								Violacein production			Mycophagy						swarming
Strain	Comy	Weathering	Sid	Chi	RS	MH	PU	FO	FC	AN	PE	TH	Purple	VioB	VioA	M. hiemalis	R. solani	Soil ph	Country	Species	Habitat	Intensity	Shape	Reference
Myc51	NA	NA	0.7	1	0	0	0	0	0	0	0	0	0	1	0	NA	NA	5.6	1	NA	former_agr_field	1	star	this study
Myc52	NA	NA	13.8	1	0	0	0	0	0	0	0	0	0	1	0	NA	NA	5.6	1	NA	former_agr_field	2	star	this study
P2	NA	NA	2.5	1	1	0	1	0	1	1	1	0	1	2	2	NA	NA	NA	1	NA	beech_forest	0	no_swarming	this study
P3	NA	NA	2.9	1	1	0	1	0	1	1	1	0	1	2	2	70.18	3	NA	1	NA	beech_forest	0	no_swarming	this study
R5TW1	NA	NA	73.6	1	1	0	1	0	1	0	1	0	0	0	0	NA	NA	5	3	NA	arctic_forest	0	no_swarming	Männistö and Häggblom, 2006
RA1BR1	NA	1.1	1	1	1	0	1	1	1	1	1	0	1	2	2	NA	NA	5	3	NA	arctic_forest	1	finger_edge_hands2	Männistö and Häggblom, 2006
RAJ3R3	NA	1.2	0	1	1	0	1	0	1	1	1	0	1	2	2	NA	NA	5	3	NA	arctic_forest	1	finger_edge_hands2	Männistö and Häggblom, 2006
S18_2	NA	NA	0	0	0	0	0	0	0	0	0	0	0	0	0	NA	NA	6.1	3	NA	arctic_bulk	0	no_swarming	Nissinen et al., 2012
S1E1	NA	1.3	60.1	1	1	0	1	0	1	1	1	0	0	0	0	NA	NA	5.3	3	NA	arctic_tundra	0	no_swarming	Männistö and Häggblom, 2006
S21	NA	NA	60.1	1	1	0	1	0	1	0	1	0	1	2	2	NA	NA	6.1	3	NA	arctic_bulk	0	no_swarming	Nissinen et al., 2012
S33	NA	NA	0	0	0	0	0	0	0	0	0	0	0	0	0	64.37	0	6.1	3	NA	arctic_bulk	0	no_swarming	Nissinen et al., 2012
S56_2	NA	NA	47.3	1	1	0	1	0	1	1	1	0	1	2	2	NA	NA	6.1	3	NA	arctic_bulk	0	no_swarming	Nissinen et al., 2012
S5T5	NA	0.6	80.4	1	1	0	1	0	1	1	1	0	1	2	2	182.64	0	5.3	3	NA	arctic_tundra	0	no_swarming	Männistö and Häggblom, 2006
SO06	2	NA	0	1	0	0	0	0	0	0	0	0	0	1	0	79.48	5.83	5.3	1	NA	unfert_grassland	1	finger_edge	Höppener-Ogawa et al., 2007
SO08	2	NA	0	1	0	0	0	0	0	0	0	0	0	1	0	NA	NA	5.3	1	NA	unfert_grassland	1	diffuse_finger_edge	Höppener-Ogawa et al., 2007
SO09	2	NA	0	1	0	0	0	0	0	0	0	0	0	1	0	NA	NA	5.3	1	NA	unfert_grassland	1	finger_edge	Höppener-Ogawa et al., 2007
SO108	1	NA	7.7	1	1	0	1	0	1	0	1	0	0	0	0	NA	NA	5.3	1	2	coastal_outer_dunes	0	no_swarming	Höppener-Ogawa et al., 2007
SO109	NA	NA	3.9	1	1	0	1	0	1	1	1	0	1	2	2	61.9	1.27	5.3	1	NA	coastal_outer_dunes	1	finger_edge	Höppener-Ogawa et al., 2007
SO110	1	NA	68.3	1	1	0	1	0	1	1	1	0	0	0	0	77.74	19.86	5.3	1	2	coastal_outer_dunes	0	no_swarming	Höppener-Ogawa et al., 2007
SO111	1	NA	7.2	1	1	0	1	0	1	0	1	0	0	0	0	NA	NA	5.3	1	2	coastal_outer_dunes	0	no_swarming	Höppener-Ogawa et al., 2007
SO112	NA	NA	19.7	1	1	0	1	0	1	1	1	0	1	2	2	NA	NA	5.3	1	NA	coastal_outer_dunes	1	ring	Höppener-Ogawa et al., 2007
SO113	1	NA	44.6	1	1	0	1	0	1	1	1	0	0	0	0	82.38	0	5.3	1	2	coastal_outer_dunes	1	ring2	Höppener-Ogawa et al., 2007
SO114	2	NA	56.3	1	0	0	0	0	0	0	0	0	0	1	0	NA	NA	5.1	1	NA	former_agr_field	0	no_swarming	Höppener-Ogawa et al., 2007
SO115	1	NA	14.8	1	0	0	0	0	0	0	0	0	0	1	0	NA	NA	5.1	1	NA	former_agr_field	1	finger_edge	Höppener-Ogawa et al., 2007
SO117	1	NA	0.8	1	1	0	1	0	1	1	1	0	0	0	0	NA	NA	5.1	1	2	former_agr_field	0	no_swarming	Höppener-Ogawa et al., 2007
SO122	NA	NA	NA	1	0	0	0	0	0	0	0	0	0	1	2	0	1.99	5.8	1	NA	unfert_grassland	3	full_plate	Höppener-Ogawa et al., 2007
SO132	NA	NA	89.5	1	0	0	0	0	0	0	0	0	0	1	0	9.88	0	4.7	1	3	marsh	0	no_swarming	Höppener-Ogawa et al., 2007
SO147	2	NA	1.2	1	0	0	0	0	0	0	0	0	0	1	0	41.85	6.55	5.6	1	NA	former_agr_field	1	ring	Höppener-Ogawa et al., 2007
SO195	1	NA	27.6	1	1	0	1	0	1	1	1	0	1	2	2	NA	NA	5.1	1	2	unfert_grassland	1	finger_edge	Höppener-Ogawa et al., 2007
SO198	NA	NA	58.4	1	0	0	0	0	0	0	0	0	0	0	0	77.01	3.76	5.1	1	2	unfert_grassland	0	no_swarming	Höppener-Ogawa et al., 2007
SO30	1	NA	0.3	1	0	0	0	0	0	0	0	0	0	1	0	NA	NA	4.9	1	NA	river_dune_grassland	1	finger_edge	Höppener-Ogawa et al., 2007
					Fungal inhibition								Violacein production			Mycophagy						swarming
Strain	Comy	Weathering	Sid	Chi	RS	MH	PU	FO	FC	AN	PE	TH	Purple	VioB	VioA	M. hiemalis	R. solani	Soil ph	Country	Species	Habitat	Intensity	Shape	Reference
SO31	1	NA	75.2	1	1	0	1	0	1	1	1	0	0	0	0	94.01	32.28	5.3	1	2	coastal_outer_dunes	0	no_swarming	Höppener-Ogawa et al., 2007
SO32	1	NA	64.8	1	1	0	1	0	1	1	1	0	0	0	0	NA	NA	5.3	1	2	coastal_outer_dunes	1	star	Höppener-Ogawa et al., 2007
SO85	1	1.3	80.6	1	1	0	1	0	1	1	1	0	0	0	0	50.13	30.25	4.1	1	2	river_dune_grassland	0	no_swarming	Höppener-Ogawa et al., 2007
SO92	NA	1.6	35.8	1	1	0	1	0	1	1	1	0	0	1	0	73.67	0	4.9	1	NA	heathland	1	meteor	Höppener-Ogawa et al., 2007
SO95	NA	1.4	0	0	0	0	0	0	0	0	0	0	0	1	0	NA	NA	4.9	1	NA	heathland	0	no_swarming	Höppener-Ogawa et al., 2007
SO96	NA	1.5	0	1	1	0	1	0	1	1	1	0	0	0	0	NA	NA	4.9	1	NA	heathland	1	coliflower	Höppener-Ogawa et al., 2007
Ter10	1	1.7	13	1	0	0	0	0	0	0	0	0	0	1	0	26.44	1.39	6.1	1	3	dune_grassland	2	star	De Boer et al., 2004
Ter113	NA	NA	58.9	1	1	0	1	1	1	1	1	0	0	0	0	NA	NA	6.1	1	2	dune_grassland	0	no_swarming	De Boer et al., 2004
Ter118	1	0.9	63.4	1	1	0	1	0	1	1	1	0	0	0	0	47.66	0	6.1	1	2	dune_grassland	0	no_swarming	De Boer et al., 2004
Ter14	2	1.2	0	1	0	0	0	0	0	0	0	0	0	1	0	NA	NA	4.9	1	NA	coastal_outer_dunes	2	finger_edge	De Boer et al., 2004
Ter146	1	1.8	0.7	1	0	0	0	0	0	0	0	0	0	1	0	NA	NA	6.1	1	3	dune_grassland	2	star	De Boer et al., 2004
Ter165	2	1.2	24.7	1	0	0	0	0	0	0	0	0	0	1	0	NA	NA	4.9	1	NA	coastal_outer_dunes	0	no_swarming	De Boer et al., 2004
Ter166	1	1.3	19.1	1	0	0	0	0	0	0	0	0	0	1	0	NA	NA	4.9	1	1	dune_grassland	1	coliflower	De Boer et al., 2004
Ter227	1	NA	7.3	1	0	0	0	0	0	0	0	0	0	0	0	52.89	5.66	4.9	1	2	dune_grassland	1	finger_edge	De Boer et al., 2004
Ter228	2	1.1	0.9	1	0	0	0	0	0	0	0	0	0	1	0	33.56	4.99	4.9	1	NA	dune_grassland	1	inside_finger	De Boer et al., 2004
Ter252	1	1	88.8	1	0	0	0	0	0	0	0	0	0	1	0	NA	NA	6.1	1	3	dune_grassland	0	no_swarming	De Boer et al., 2004
Ter266	2	NA	0	1	0	0	0	0	0	0	0	0	0	1	0	NA	NA	4.9	1	NA	dune_grassland	2	finger_edge	De Boer et al., 2004
Ter282	1	1.5	66.9	1	0	0	0	0	0	0	0	0	0	1	0	NA	NA	6.1	1	3	dune_grassland	2	star	De Boer et al., 2004
Ter291	1	NA	44.6	1	1	0	1	1	1	1	1	0	0	0	0	NA	NA	6.1	1	2	dune_grassland	1	runner	De Boer et al., 2004
Ter299	2	NA	0	1	0	0	0	0	0	0	0	0	0	1	0	71.78	4.31	4.9	1	NA	coastal_outer_dunes	1	finger_edge	De Boer et al., 2004
Ter300	1	1.1	0.5	1	0	0	0	0	0	0	0	0	0	1	0	NA	NA	4.9	1	1	dune_grassland	1	finger_edge	De Boer et al., 2004
Ter330	1	1.5	0.4	1	0	0	0	0	0	0	0	0	0	1	0	NA	NA	4.9	1	1	dune_grassland	1	finger_edge	De Boer et al., 2004
Ter331	2	1.8	0.4	1	0	0	0	0	0	0	0	0	0	1	0	21.5	0	4.9	1	NA	coastal_outer_dunes	1	finger_edge	De Boer et al., 2004
Ter6	1	1.7	0	1	0	0	0	0	0	0	0	0	0	1	0	0	0	4.9	1	1	dune_grassland	1	meteor	De Boer et al., 2004
Ter72	NA	NA	6.2	1	1	0	1	1	1	1	1	0	0	0	0	NA	NA	6.1	1	NA	coastal_outer_dunes	0	no_swarming	De Boer et al., 2004
Ter90	1	1.4	62	1	1	0	1	0	1	1	1	0	0	1	0	34.44	25.23	4.9	1	2	dune_grassland	0	no_swarming	De Boer et al., 2004
Ter91	1	1.4	8.2	1	0	0	0	0	0	0	0	0	0	0	0	92.26	5.49	4.9	1	2	dune_grassland	0	no_swarming	De Boer et al., 2004
Ter94	NA	NA	59.8	1	0	0	0	0	0	0	0	0	0	0	0	NA	NA	4.9	1	NA	coastal_outer_dunes	1	finger_edge	De Boer et al., 2004
