# Supplementary material for: Trait Differentiation within the Fungus-Feeding (Mycophagous) Bacterial Genus Collimonas
Source: PLoS One. 2016 Jun 16;11(6):e0157552. doi: 10.1371/journal.pone.0157552 (PMC4911057; doi:10.1371/journal.pone.0157552)
Supplement: S3 Table — Amplified gene, respective sequences of forward and reverse primers, annealing temperatures, and resulting amplicon sizes are given. (XLS) [file pone.0157552.s003.xls]

## Sheet: Sheet1
	Primer sequence (5' - 3')
Gene	Forward	Reverse	Annealing temperature (°C)	Amplicon size (bp)
gyrB	GGCCTGGAAGCGGTRCGCAA	TCYTTGCCGGTGCGCTGGTC	60	641
rpoB	AACRCCKGAAGGCCCGAACA	TCGGCGATCACGTCRTGCTT	60	629
